# Supplementary material for: Polymorphic and morphological selection of CaCO3 by magnesium-assisted mineralization in gelatin: magnesium-rich spheres consisting of centrally aligned calcite nanorods and their good mechanical properties
Source: Royal Society of Chemistry journal article supplement (doi:10.1039/c0ce00583e), 2011-01-01
Supplement: c0ce00583e.pdf [file c0ce00583e.pdf]

## Supporting Information

### **Polymorphic and Morphological Selection of CaCO<sub>3</sub> by Magnesium-Assisted Mineralization in Gelatin: Magnesium-Rich Spheres Consisting of Centrally Aligned Calcite Nanorods and Their Good Mechanical Properties**

*Junwu Xiao, and Shihe Yang\**

Department of Chemistry, William Mong Institute of Nano Science and Technology,  
The Hong Kong University of Science and Technology, Clear Water Bay, Kowloon,  
Hong Kong (China)

E-mail: chsyang@ust.hk

**Calculating the percentages of aragonite and magnesium calcites:** The percentages of aragonite (A) and magnesium calcite (MC) in the samples of G<sub>3</sub>Mg<sub>50</sub> and G<sub>5</sub>Mg<sub>50</sub> are determined by the Reference Intensity Ratios (RIR) method, and calculated by the following equations:

$$W_A = \frac{I_A}{I_A + \frac{I_{MC}}{K_A^{MC}}} \quad W_{MC} = \frac{I_{MC}}{I_{MC} + \frac{I_A}{K_{MC}^A}} = 1 - W_A$$
$$K_A^{MC} = \frac{K_{Al_2O_3}^{MC}}{K_{Al_2O_3}^A} = 2.00 \quad K_{MC}^A = \frac{K_{Al_2O_3}^A}{K_{Al_2O_3}^{MC}} = 0.50$$

$W_A$  and  $W_{MC}$  are the percentages of aragonite and magnesium calcite phases in the samples, respectively.  $I_A$  and  $I_{MC}$  are the intensity of (111) of aragonite and (104) of magnesium calcite phases in the XRD pattern, respectively.  $K_{Al_2O_3}^A$  and  $K_{Al_2O_3}^{MC}$  are the K values of aragonite and magnesium calcite phases relative to Al<sub>2</sub>O<sub>3</sub> crystals, respectively.

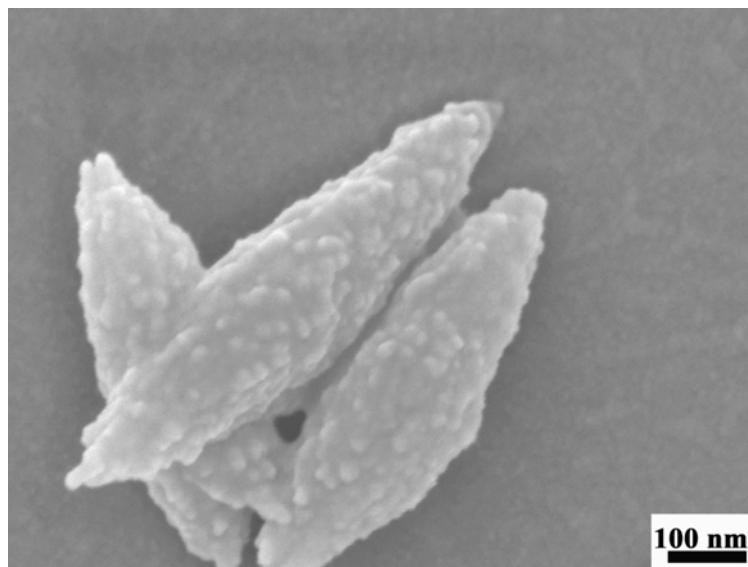

**Fig. SI-1.** The high magnification SEM image of CaCO<sub>3</sub>·H<sub>2</sub>O in the sample of G<sub>1</sub>Mg<sub>50</sub>. Together with Fig. 2B, it shows that the CaCO<sub>3</sub>·H<sub>2</sub>O particles in the sample of G<sub>1</sub>Mg<sub>50</sub> are in spindle shape.

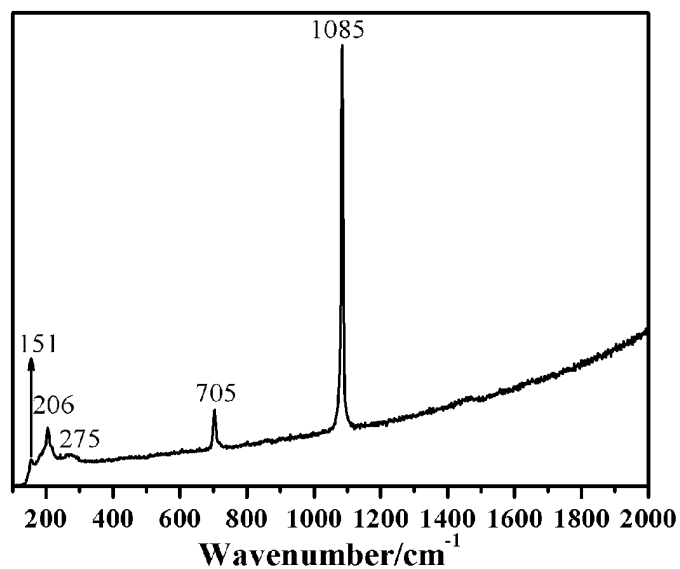

**Fig. SI-2.** Raman spectrum of hemispherical shaped microparticles of  $G_3Mg_{50}$  (Lattice mode of aragonite: 151, 206 and 275  $\text{cm}^{-1}$ ;  $\nu_4$  in-plane bending of aragonite: 705  $\text{cm}^{-1}$ ;  $\nu_1$  symmetric stretching of aragonite: 1085  $\text{cm}^{-1}$ ).<sup>[1]</sup> The Raman spectrum reveals that the hemispherical shaped microparticles are in aragonite phase.

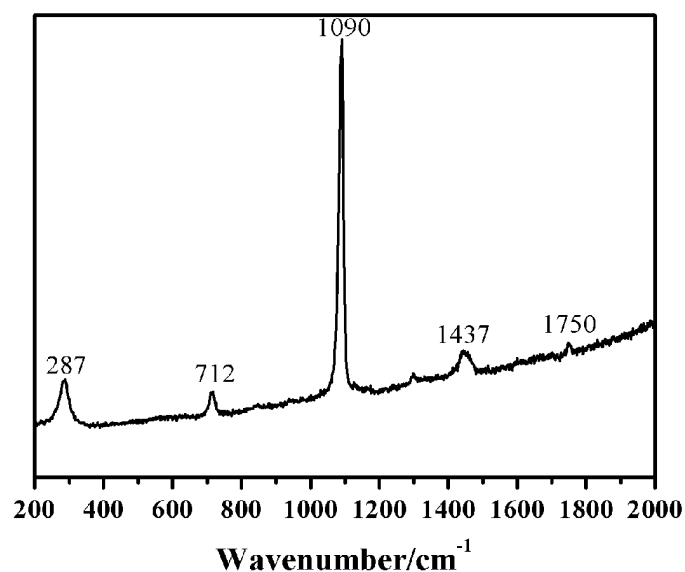

**Fig. SI-3.** Raman spectrum of microspheres of G<sub>5</sub>Mg<sub>50</sub> (Lattice mode of magnesium calcite: 287 cm<sup>-1</sup>; v<sub>4</sub> in-plane bending of magnesium calcite: 712 cm<sup>-1</sup>; v<sub>1</sub> symmetric stretching of magnesium calcite: 1090 cm<sup>-1</sup>; v<sub>3</sub> asymmetric stretching of magnesium calcite: 1437 cm<sup>-1</sup>; overtone (v<sub>2</sub> out of plane bending×2) of magnesium calcite: 1750 cm<sup>-1</sup>).<sup>[1]</sup> The Raman spectrum reveals that the microspheres of G<sub>5</sub>Mg<sub>50</sub> are in magnesium calcite phase.

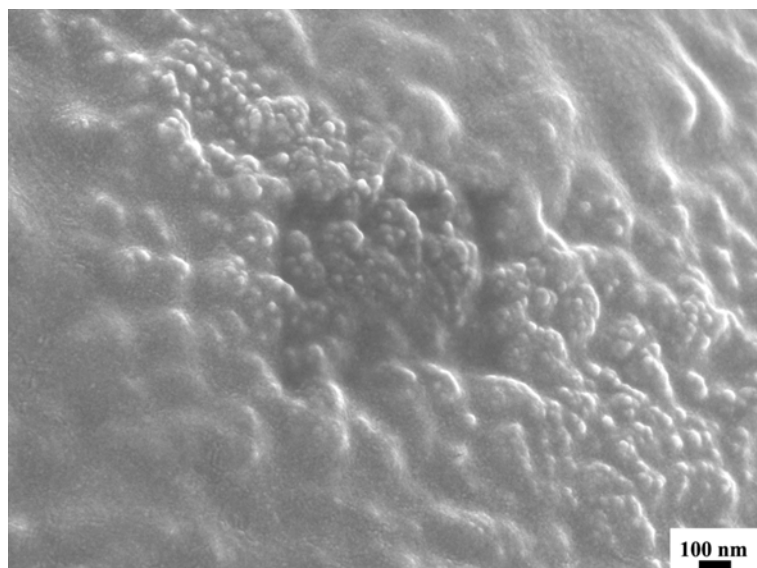

**Fig. SI-4.** SEM image showing the surface of hemispherical shaped aragonite microparticles of  $G_3Mg_{50}$ . Together with Fig. 2C and D, it shows that aragonite hemispheres are assembled by random aggregation of  $\sim 30$  nm nanoparticles.

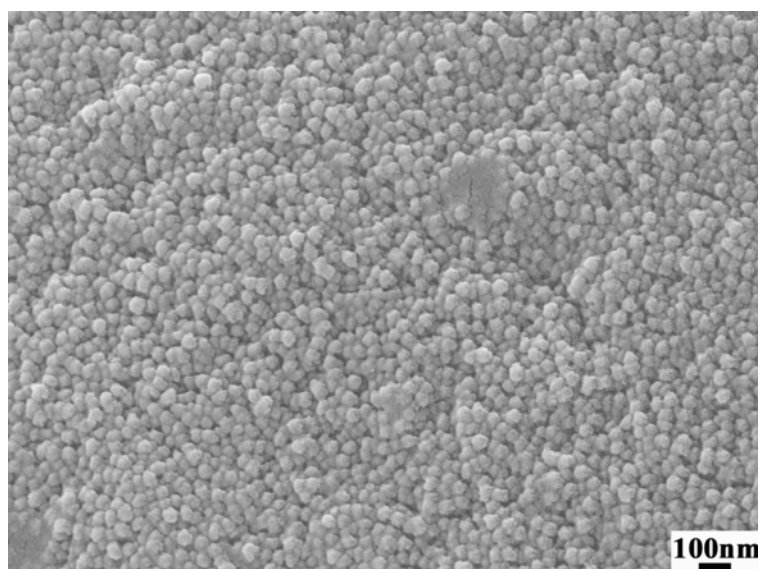

**Fig. SI-5.** SEM image of the surface of high magnesium calcite microspheres (HMCs) in the sample of  $G_5Mg_{50}$ . Together with Fig. 2E and F, it shows that  $G_5Mg_{50}$  HMCs are composed of the centrally aligned nanorods.

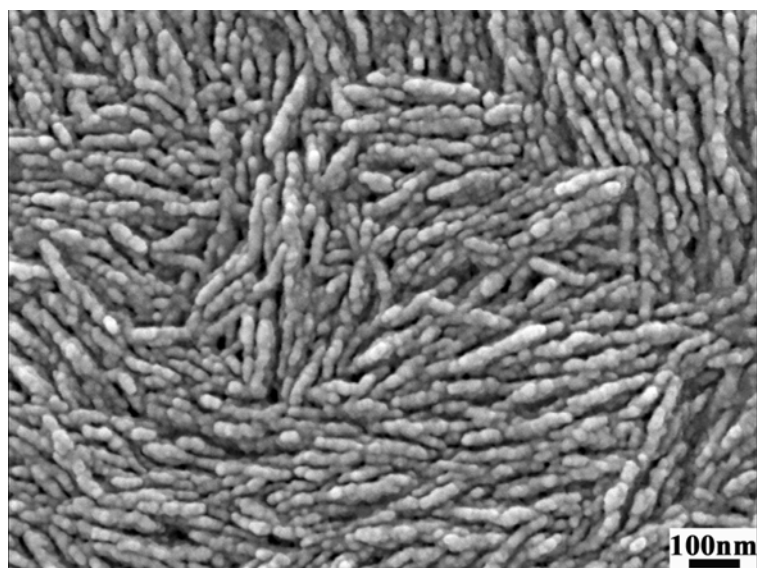

**Fig. SI-6.** SEM image showing the surface of low magnesium calcite microspheres (LMCMs) in the sample of  $G_5Mg_{20}$ . Together with Fig. 3A and B, it reveals that  $G_5Mg_{20}$  LMCMs are assembled from worm-like nanoparticles  $\sim 15$  nm in diameter and  $\sim 100$  nm in length in a way similar to wing wool into a ball.



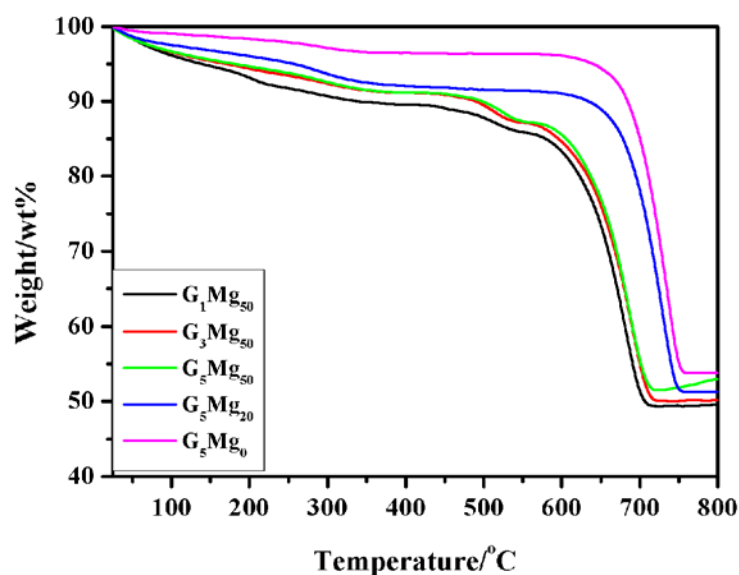

**Fig. SI-7.** TGA curves of G<sub>1</sub>Mg<sub>50</sub>, G<sub>3</sub>Mg<sub>50</sub>, G<sub>5</sub>Mg<sub>50</sub>, G<sub>5</sub>Mg<sub>20</sub> and G<sub>5</sub>Mg<sub>0</sub>. Several features can be recognized from the TGA curves. First, free and bound water molecules were fully lost at < 200 °C. Second, gelatin matrix was decomposed in the temperature range between 200 and 350 °C, and the organic residues were continually burned between 350 and 600 °C. Third, the CaCO<sub>3</sub> crystals began to decompose at > 600 °C. As for calculating the percentages of the different components in the samples, the percentages of inorganic component are calculated from the transition around 600 °C. The percentages of water are calculated before the first transition. The rests are the percentages of gelatin matrix.

[1] C. Gabrielli, R. Jaouhari, S. Joiret and G. Maurin, *J. Raman Spectrosc.*, 2000, **31**, 497-501.
